# Supplementary material for: Biofilm vs. Planktonic Lifestyle: Consequences for Pesticide 2,4-D Metabolism by Cupriavidus necator JMP134
Source: PubMed Central journal article supplement (PMC5440565; doi:10.3389/fmicb.2017.00904), 2017-05-23
Supplement: Image1.pdf [file Image1.pdf]

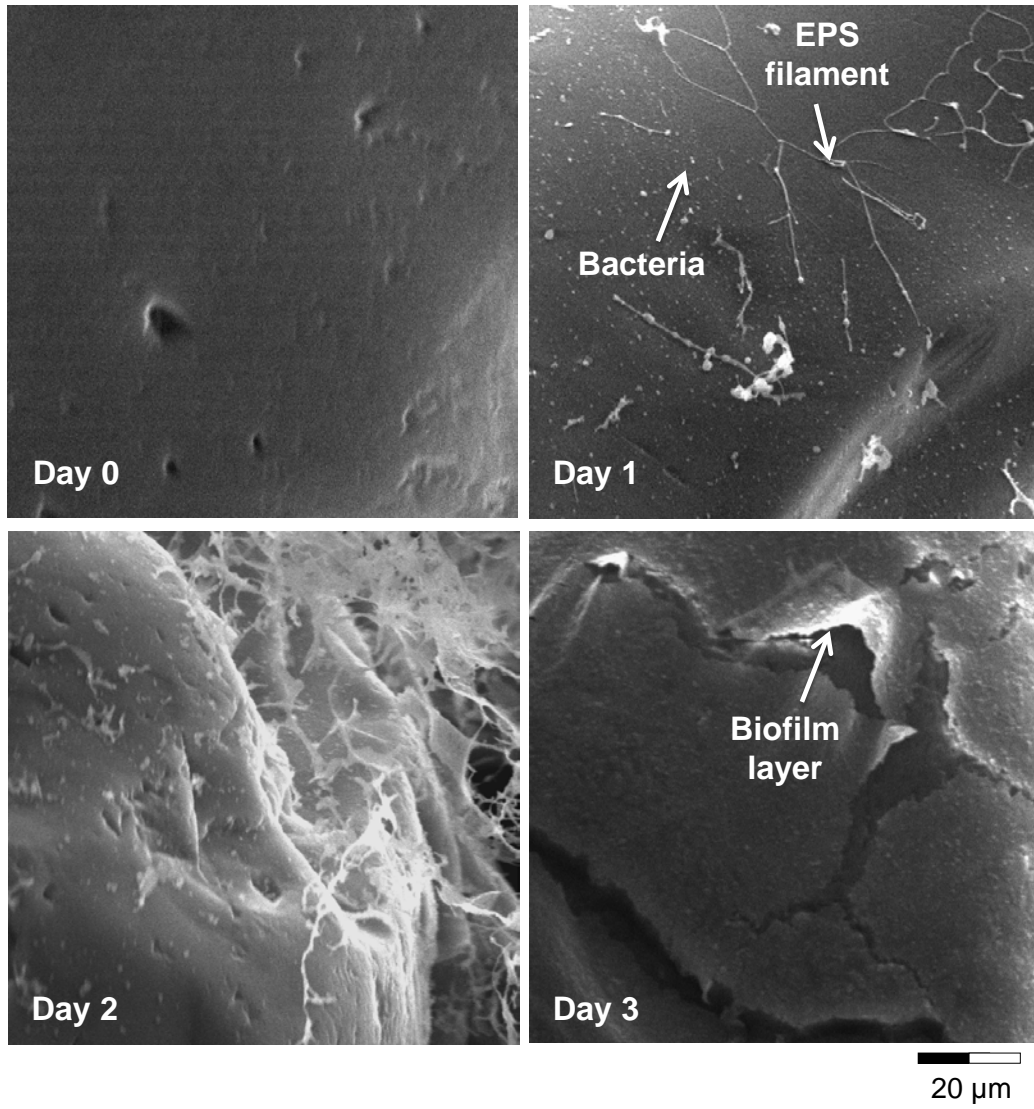

**Figure S1:** Scanning Electron Microscopy of the sand grains surface at 0, 1, 2 and 3 days of incubation.
