# Supplementary material for: Biofilm vs. Planktonic Lifestyle: Consequences for Pesticide 2,4-D Metabolism by Cupriavidus necator JMP134
Source: PubMed Central journal article supplement (PMC5440565; doi:10.3389/fmicb.2017.00904), 2017-05-23
Supplement: Image2.pdf [file Image2.pdf]

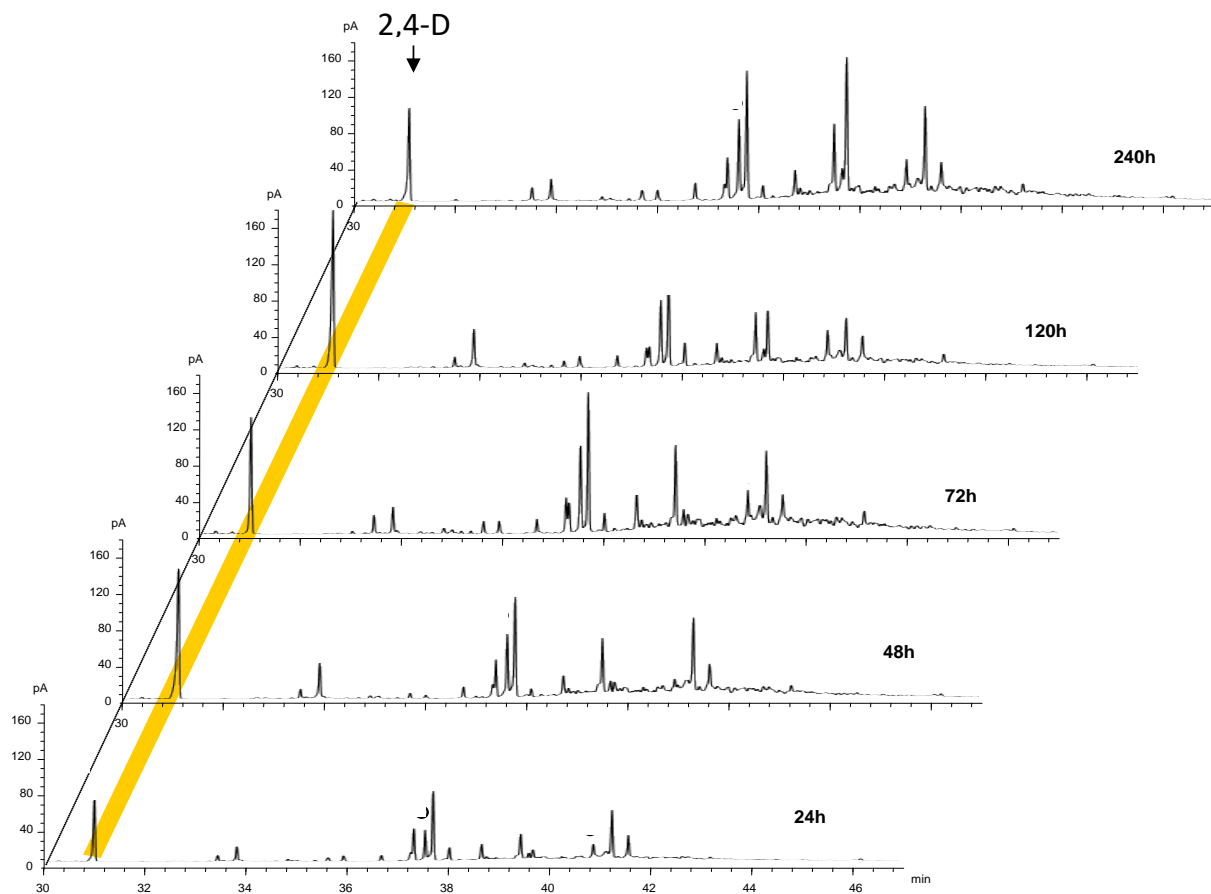

**Figure S2:** Example of chromatograms (GC-FID) of the lipid fraction obtained from the sand samples at each sampling date. 2,4-D but no metabolites were detected. The other peaks corresponded to the bacterial fatty acids.
