# Supplementary material for: Biofilm vs. Planktonic Lifestyle: Consequences for Pesticide 2,4-D Metabolism by Cupriavidus necator JMP134
Source: PubMed Central journal article supplement (PMC5440565; doi:10.3389/fmicb.2017.00904), 2017-05-23
Supplement: Image3.pdf [file Image3.pdf]

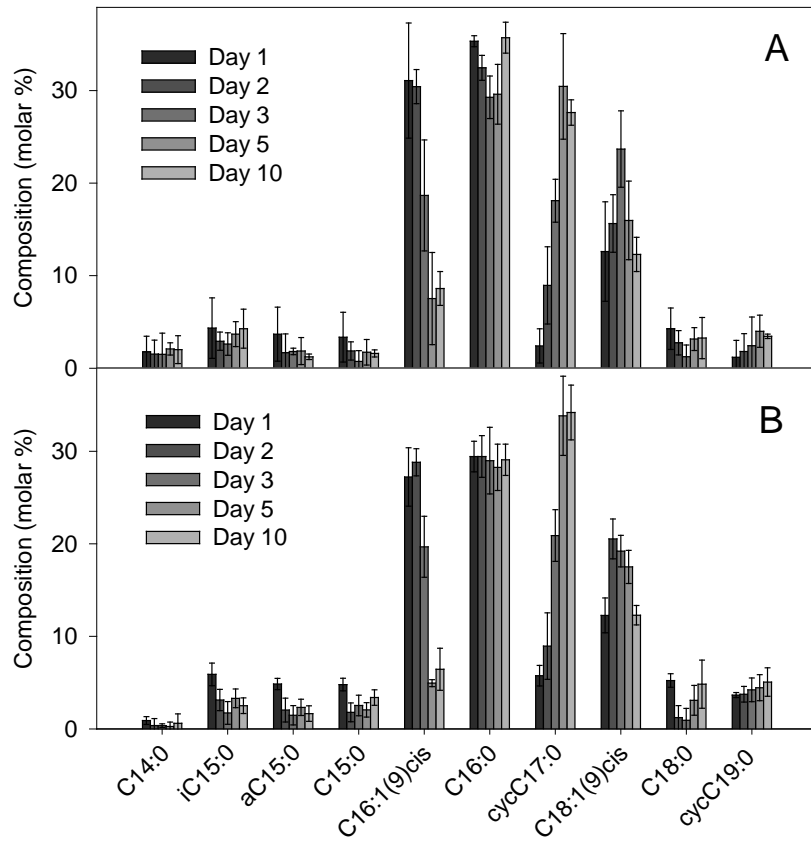

**Figure S3:** Composition (molar percentage) of *C. necator* JMP134 FAME profiles in the control (upper) and sand (lower) samples at each sampling date. Error bars correspond to the standard deviation calculated for 3 replicates.
