# Supplementary material for: Biofilm vs. Planktonic Lifestyle: Consequences for Pesticide 2,4-D Metabolism by Cupriavidus necator JMP134
Source: PubMed Central journal article supplement (PMC5440565; doi:10.3389/fmicb.2017.00904), 2017-05-23
Supplement: Image4.pdf [file Image4.pdf]

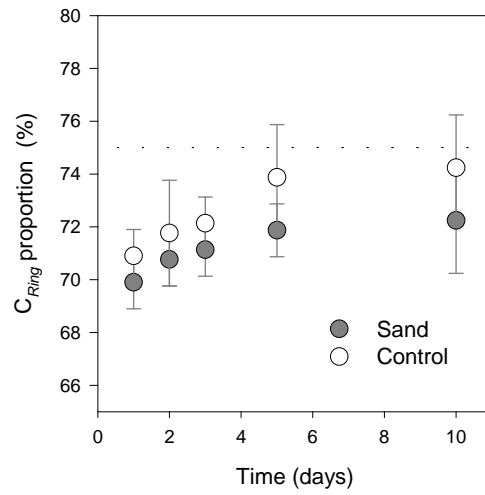

**Figure S4:** Proportion of  $C_{Ring}$  in the  $CO_2$  evolved during the 10 day incubation of *C.necator* JMP134 in the control (white circles) and sand (grey circles) microcosms. Error bars correspond to the standard deviation calculated for 3 replicates. Dash line represents the proportion of  $C_{Ring}$  in the substrate (2,4-D) used.
