# Supplementary material for: Biofilm vs. Planktonic Lifestyle: Consequences for Pesticide 2,4-D Metabolism by Cupriavidus necator JMP134
Source: PubMed Central journal article supplement (PMC5440565; doi:10.3389/fmicb.2017.00904), 2017-05-23
Supplement: Image5.pdf [file Image5.pdf]

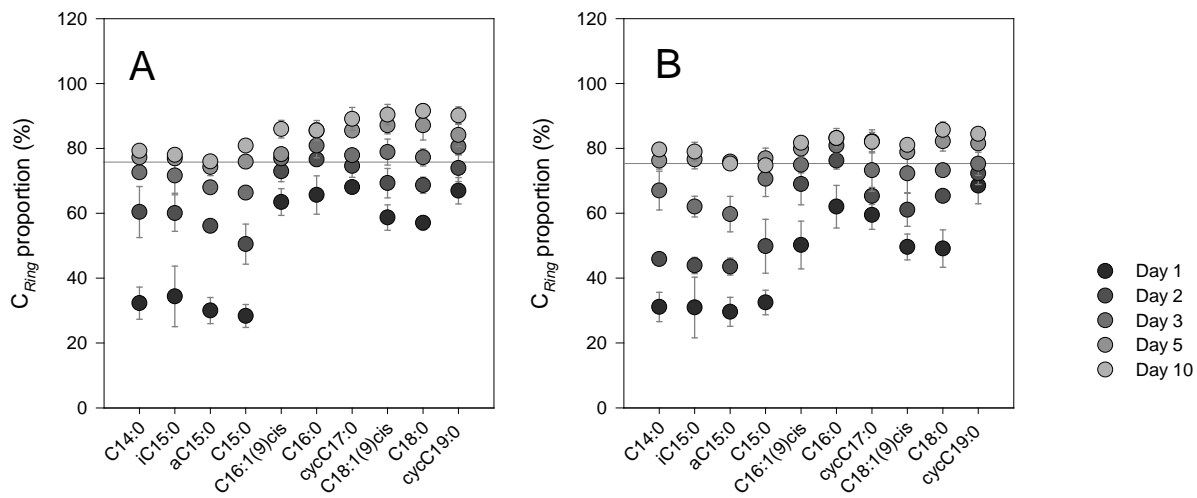

**Figure S5:** Proportion of  $C_{Ring}$  in each FAME of *C. necator* JMP134 for the control (A) and sand (B) microcosms at each sampling date. Error bars correspond to the standard deviation calculated for 3 replicates. The grey line represents the proportion of  $C_{Ring}$  in the substrate (2,4-D) used.
