# Supplementary material for: Biofilm vs. Planktonic Lifestyle: Consequences for Pesticide 2,4-D Metabolism by Cupriavidus necator JMP134
Source: PubMed Central journal article supplement (PMC5440565; doi:10.3389/fmicb.2017.00904), 2017-05-23
Supplement: Table1.pdf [file Table1.pdf]

**Table S1:** Evolution of the cyclopropyl/precursor ratio (cycC17:0+cycC19:0/C16:1 $\omega$ 9c+C18:1 $\omega$ 9c) with time. Data are the means and standard deviations calculated for 3 replicates at each date of sampling.

| Days | Control Samples                  | Samples with sand                |
|------|----------------------------------|----------------------------------|
| 1    | 0,28 $\pm$ 0,02                  | 0,24 $\pm$ 0,02                  |
| 2    | 0,23 $\pm$ 0,02                  | 0,26 $\pm$ 0,02                  |
| 3    | <b>0,48 <math>\pm</math>0,04</b> | <b>0,65 <math>\pm</math>0,05</b> |
| 5    | <b>1,47 <math>\pm</math>0,10</b> | <b>1,71 <math>\pm</math>0,11</b> |
| 10   | <b>1,49 <math>\pm</math>0,12</b> | <b>2,10 <math>\pm</math>0,17</b> |
